# Supplementary material
Source: PubMed Central journal article supplement (PMC2978604)
Supplement: supp_M110.166231_jbc.M110.166231-1.pdf [file supp_M110.166231_jbc.M110.166231-1.pdf]

### **SUPPLEMENTAL DATA**

Supplemental table 1. FXR-deficiency attenuates the influence of RSG on adipocyte size distribution. Adipocyte size was determined in 8 mice per group and a total of 200 adipocytes per animal. Statistical significance was analyzed using the univariate ANOVA and Bonferroni test. Significant differences ( $P < 0.01$ ) between conditions are indicated by different letters (a, b, c).

Supplemental table 2. List of specific primers used in this study. Primers were designed using the Primer3 software.

| Genotype           | Treatment | Mean of adipocyte diameters ( $\mu\text{m}$ ) | S.D | Percentage change of adipocyte size (RSG/Control) |
|--------------------|-----------|-----------------------------------------------|-----|---------------------------------------------------|
| FXR <sup>+/+</sup> | Control   | 90 <sup>a</sup>                               | 26  | 12%                                               |
| FXR <sup>+/+</sup> | RSG       | 80 <sup>b</sup>                               | 23  |                                                   |
| FXR <sup>-/-</sup> | Control   | 78 <sup>b</sup>                               | 21  | 6%                                                |
| FXR <sup>-/-</sup> | RSG       | 73 <sup>c</sup>                               | 20  |                                                   |

Abdelkarim et al. - Supplemental Table 2

| Gene             | sens    | Specific primers                  |
|------------------|---------|-----------------------------------|
| Cyclophilin      | Forward | GCA TAC GGG TCC TGG CAT CTT GTC C |
|                  | Reverse | ATG GTG ATC TTC TTG CTG GTC TTG C |
| aP2              | Forward | GAA TTC GAT GAA ATC ACC GCA       |
|                  | Reverse | CTC TTT ATT GTG GTC GAC TTT CCA   |
| CEBP $\alpha$    | Forward | CCA AGA AGT CGG TGG ACA AGA       |
|                  | Reverse | CGG TCA TTG TCA CTG GTC AAC T     |
| CEBP $\beta$     | Forward | CCA AGG CCA AGG CCA AGA AG        |
|                  | Reverse | AAG TTC CGC AGG GTG CTG AG        |
| PPAR $\gamma$    | Forward | TGC TGT TAT GGG TGA AAC TCT GGG   |
|                  | Reverse | GGC TTG ATG TCA AAG GAA TGC G     |
| CD36             | Forward | GGA TCT GAA ATC GAC CTT AAA G     |
|                  | Reverse | TAG CTG GCT TGA CCA ATA TGT T     |
| Adiponectin      | Forward | TCT CCT GTT CCT CTT AAT CCT GCC   |
|                  | Reverse | CAT CTC CTT TCT CTC CCT TCT CTC C |
| LPL              | Forward | TGT TTC TCC TGC CTG ATG TCT TC    |
|                  | Reverse | GGC TAA CCC AGG GTG AGG AA        |
| Perilipin        | Forward | AGA GTT CTG CAG CTG CCT GTG       |
|                  | Reverse | CAG AGG TGC TTG CAA TGG GCA       |
| ADRP             | Forward | CAG CCA ACG TCC GAG ATT G         |
|                  | Reverse | GAC ATC CTT CGC CCC AGT           |
| S3-12            | Forward | GCT GCT CCA ACC TTC TGA AC        |
|                  | Reverse | TCC CTT GAC AAG ACC TTT GG        |
| FSP27            | Forward | CTG GAG GAA GAT GGC ACA AT        |
|                  | Reverse | GGG CCA CAT CGA TCT TCT TA        |
| SFRP1            | Forward | CGA GTT TGC ACT GAG GAT GA        |
|                  | Reverse | CGT TCT TCA GGA ACA GCA CA        |
| SFRP5            | Forward | TCT TCC TCT GCT CGC TCT TC        |
|                  | Reverse | GGG CAC AGA TCT TGG TCA CA        |
| $\beta$ -catenin | Forward | TCT GAG CCC TAG TCA TTG CAT       |
|                  | Reverse | GGA TTC TGG AAT CCA TTC TGG       |
| LRP5             | Forward | CAACCTGGACGGCTCCTT                |
|                  | Reverse | CTCTGCTCCCCTGTCCACT               |
| Axin2            | Forward | CTC CCC ACC TTG AAT GAA GA        |
|                  | Reverse | ACT GGG TCG CTT CTC TTG AA        |
| Cyclin D1        | Forward | ATG CTG GAG GTC TGT GAG GA        |
|                  | Reverse | AGT TCC ATT TGC AGC AGC TC        |
| c-Myc            | Forward | AGT CGG GCT CAT CTC CAT C         |
|                  | Reverse | CTT GTC GTT TTC CTC CGT GT        |
